# Supplementary material for: Effects of Prepartum Dietary Energy Level and Nicotinic Acid Supplementation on Immunological, Hematological and Biochemical Parameters of Periparturient Dairy Cows Differing in Parity
Source: Animals (Basel). 2015 Sep 8;5(3):910–33. doi: 10.3390/ani5030391 (PMC4598713; doi:10.3390/ani5030391)
Supplement: Supplementary File 1 [file animals-05-00391-s001.pdf]

## Effects of Prepartum Dietary Energy Level and Nicotinic Acid Supplementation on Immunological, Hematological and Biochemical Parameters of Periparturient Dairy Cows Differing in Parity

**Table S1.** The effects of different nutritional levels *prepartum* and nicotinic acid supplementation (24 g/d) on serum activities of glutamic-oxaloacetic-transaminase (GOT), gamma-glutamyl transferase ( $\gamma$ -GT) and glutamatedehydrogenase (GLDH) of primiparous and multiparous cows during late gestation, periparturient period and early lactation (LSMeans  $\pm$  SE).

| Item                     | P <sup>1</sup> | Diet                |                    |                     |                    | P-Value        |                |                |                |             |
|--------------------------|----------------|---------------------|--------------------|---------------------|--------------------|----------------|----------------|----------------|----------------|-------------|
|                          |                | LC-CON <sup>2</sup> | LC-NA <sup>3</sup> | HC-CON <sup>4</sup> | HC-NA <sup>5</sup> | C <sup>6</sup> | S <sup>7</sup> | P <sup>1</sup> | T <sup>8</sup> | C*S*<br>P*T |
| GOT, U/L                 |                |                     |                    |                     |                    | 0.032          | 0.022          | 0.726          | <0.001         | 0.781       |
| –42 until B <sup>9</sup> | 1              | 58.4 $\pm$ 10.4     | 58.9 $\pm$ 11.5    | 51.8 $\pm$ 12.6     | 75.6 $\pm$ 10.4    |                |                |                |                |             |
|                          | >1             | 46.0 $\pm$ 8.9      | 71.8 $\pm$ 9.6     | 55.9 $\pm$ 7.7      | 72.0 $\pm$ 8.9     |                |                |                |                |             |
| 1–28 DIM                 | 1              | 77.5 $\pm$ 10.2     | 74.3 $\pm$ 11.4    | 70.3 $\pm$ 11.4     | 100.2 $\pm$ 10.2   |                |                |                |                |             |
|                          | >1             | 67.3 $\pm$ 8.6      | 96.3 $\pm$ 9.3     | 90.8 $\pm$ 7.6      | 100.3 $\pm$ 8.6    |                |                |                |                |             |
| 29–100 DIM               | 1              | 84.8 $\pm$ 10.3     | 80.0 $\pm$ 11.4    | 91.1 $\pm$ 11.4     | 100.8 $\pm$ 10.2   |                |                |                |                |             |
|                          | >1             | 73.3 $\pm$ 8.6      | 80.1 $\pm$ 9.4     | 97.0 $\pm$ 7.6      | 93.3 $\pm$ 8.6     |                |                |                |                |             |
| $\gamma$ -GT, U/L        |                |                     |                    |                     |                    | 0.384          | 0.061          | 0.002          | <0.001         | 0.066       |
| –42 until B <sup>9</sup> | 1              | 16.2 $\pm$ 3.6      | 20.4 $\pm$ 4.0     | 16.2 $\pm$ 4.1      | 17.6 $\pm$ 3.6     |                |                |                |                |             |
|                          | >1             | 18.3 $\pm$ 3.0      | 22.2 $\pm$ 3.3     | 20.6 $\pm$ 2.7      | 24.1 $\pm$ 3.0     |                |                |                |                |             |
| 1–28 DIM                 | 1              | 18.7 $\pm$ 3.5      | 22.9 $\pm$ 3.9     | 20.6 $\pm$ 3.9      | 21.2 $\pm$ 3.5     |                |                |                |                |             |
|                          | >1             | 18.2 $\pm$ 3.0      | 30.9 $\pm$ 3.2     | 31.5 $\pm$ 2.6      | 27.3 $\pm$ 3.0     |                |                |                |                |             |
| 29–100 DIM               | 1              | 20.0 $\pm$ 3.5      | 24.9 $\pm$ 3.9     | 25.0 $\pm$ 3.9      | 26.0 $\pm$ 3.5     |                |                |                |                |             |
|                          | >1             | 25.6 $\pm$ 3.0      | 40.6 $\pm$ 3.5     | 35.4 $\pm$ 2.6      | 34.6 $\pm$ 3.0     |                |                |                |                |             |
| GLDH, U/L                |                |                     |                    |                     |                    | 0.826          | 0.492          | 0.301          | <0.001         | 0.867       |
| –42 until B <sup>9</sup> | 1              | 6.9 $\pm$ 8.4       | 9.9 $\pm$ 9.3      | 6.6 $\pm$ 9.7       | 7.7 $\pm$ 8.4      |                |                |                |                |             |
|                          | >1             | 7.4 $\pm$ 7.2       | 12.0 $\pm$ 7.8     | 11.0 $\pm$ 6.2      | 12.3 $\pm$ 7.2     |                |                |                |                |             |
| 1–28 DIM                 | 1              | 8.9 $\pm$ 8.3       | 25.2 $\pm$ 9.2     | 16.4 $\pm$ 9.3      | 12.8 $\pm$ 8.3     |                |                |                |                |             |
|                          | >1             | 17.2 $\pm$ 7.0      | 33.3 $\pm$ 7.5     | 25.2 $\pm$ 6.1      | 16.7 $\pm$ 6.9     |                |                |                |                |             |
| 29–100 DIM               | 1              | 21.9 $\pm$ 8.3      | 40.3 $\pm$ 9.2     | 43.5 $\pm$ 9.2      | 38.3 $\pm$ 8.2     |                |                |                |                |             |
|                          | >1             | 37.7 $\pm$ 7.0      | 34.8 $\pm$ 7.5     | 43.1 $\pm$ 6.1      | 31.3 $\pm$ 6.9     |                |                |                |                |             |

<sup>1</sup> Parity; 1 = primiparous cows (LC-CON: n = 5; LC-NA: n = 4; HC-CON: n = 4; HC-NA: n = 5) and >1 = multiparous cows (LC-CON: n = 7; LC-NA: n = 6; HC-CON: n = 9; HC-NA: n = 7); <sup>2</sup> Low concentrate diet plus control concentrate (42 d *prepartum* until 24 DIM). Concentrate to roughage ratio 30:70 *prepartum*. After parturition the concentrate allowance increased from 30% to 50% within 16 d; <sup>3</sup> Low concentrate diet plus 24 g nicotinic acid/d (42 d *prepartum* until 24 DIM). Concentrate to roughage ratio 30:70 *prepartum*. After parturition the concentrate allowance increased from 30% to 50% within 16 d; <sup>4</sup> High concentrate diet plus control concentrate (42 d *prepartum* until 24 DIM). Concentrate to roughage ratio 60:40 *prepartum*.



|                          |    |              |              |              |              |       |       |       |        |       |
|--------------------------|----|--------------|--------------|--------------|--------------|-------|-------|-------|--------|-------|
| mg/dL                    |    |              |              |              |              |       |       |       |        |       |
| −42 until B <sup>9</sup> | 1  | 81.3 ± 10.2  | 93.0 ± 11.3  | 89.9 ± 11.5  | 106.2 ± 10.2 | 0.499 | 0.726 | 0.001 | <0.001 | 0.095 |
|                          | >1 | 77.0 ± 8.6   | 97.2 ± 9.4   | 77.5 ± 7.6   | 87.7 ± 8.7   |       |       |       |        |       |
| 1–28 DIM                 | 1  | 84.8 ± 10.0  | 99.8 ± 11.2  | 82.4 ± 11.2  | 97.8 ± 10.0  |       |       |       |        |       |
|                          | >1 | 85.5 ± 8.5   | 110.4 ± 9.2  | 77.9 ± 7.5   | 97.8 ± 8.5   |       |       |       |        |       |
| 29–100 DIM               | 1  | 142.6 ± 10.1 | 169.0 ± 11.2 | 152.8 ± 11.2 | 171.6 ± 10.0 |       |       |       |        |       |
|                          | >1 | 134.8 ± 8.5  | 183.8 ± 9.2  | 133.4 ± 7.5  | 158.0 ± 8.5  |       |       |       |        |       |

<sup>1</sup> Parity; 1 = primiparous cows (LC-CON: n = 5; LC-NA: n = 4; HC-CON: n = 4; HC-NA: n = 5) and >1 = multiparous cows (LC-CON: n = 7; LC-NA: n = 6; HC-CON: n = 9; HC-NA: n = 7); <sup>2</sup> Low concentrate diet plus control concentrate (42 d *prepartum* until 24 DIM). Concentrate to roughage ratio 30:70 *prepartum*. After parturition the concentrate allowance increased from 30% to 50% within 16 d; <sup>3</sup> Low concentrate diet plus 24 g nicotinic acid/d (42 d *prepartum* until 24 DIM). Concentrate to roughage ratio 30:70 *prepartum*. After parturition the concentrate allowance increased from 30% to 50% within 16 d; <sup>4</sup> High concentrate diet plus control concentrate (42 d *prepartum* until 24 DIM). Concentrate to roughage ratio 60:40 *prepartum*. After parturition the concentrate allowance increased from 30% to 50% within 24 d; <sup>5</sup> High concentrate diet plus 24 g nicotinic acid/d (42 d *prepartum* until 24 DIM). Concentrate to roughage ratio 60:40 *prepartum*. After parturition the concentrate allowance increased from 30% to 50% within 24 d; <sup>6</sup> Concentrate proportion. Low concentrate diet (30% concentrate) or high concentrate diet (60% concentrate) either associated with a time-dependent increase of concentrate proportion up to 50% *postpartum*; <sup>7</sup> Supplementation. Concentrate premix containing nicotinic acid (24 g of NA/d and cow) or control concentrate (0 g of NA/d and cow); <sup>8</sup> Period. 1st period: d −42 until parturition; 2nd period: 1 until 28 DIM; 3rd period: 29 until 100 DIM; <sup>9</sup> The day of birth.
